# Supplementary material
Source: PubMed Central journal article supplement (PMC7443994)
Supplement: DS_10.1177_0022034520924656.pdf [file DS_10.1177_0022034520924656.pdf]

## **APPENDIX**

### **Supplemental Figure 1: Expression of Notch and Notch ligands in NVR mouse at**

**E18.5.** Immunohistochemistry was performed for Notch1, Notch 2, Notch 4, HES1, DDL4 and JAGGED1 in the TMJ condyles of *CBF:H2B-Venus* reporter mouse strain (NVR) at E18.5.

### **Supplemental Figure 2: Generation of fibrocartilage stem cell (FCSC) line with**

**ligand independent constitutively activated Notch.** (a) PCR analysis following enzymatic restriction digest confirming Notch intracellular domain (NICD) in bacterial colonies. Lane 3 represents positive NICD colony. (b) Rat FCSCs following 48hrs transduction with GFP NCID plasmid lentivirus.

### **Supplemental Figure 3: Expression of Notch receptors are increased in TNF-alpha**

**induced TMJ arthritis mouse model.** (a) TNF-alpha was injected unilaterally into the TMJ intra-articular space of 6 week-old mice twice 3 days apart to induce inflammatory TMJ arthritis, while saline was injected into the contralateral TMJ as a control. TMJ condyles were examined by immunohistochemistry after 2 and 14 days. (b) Immunohistochemistry was performed for Notch1, Notch 2 and Notch 4 in TMJ condyles following exposure to saline control and TNF-alpha.

### **Supplemental Figure 4: Expression of Notch ligands are increased in TNF-alpha**

**induced TMJ arthritis mouse model.** (a) TNF-alpha was injected unilaterally into the TMJ intra-articular space of 6 week-old mice twice 3 days apart to induce inflammatory TMJ arthritis, while saline was injected into the contralateral TMJ as a control. TMJ condyles were examined by immunohistochemistry after 2 and 14 days. (b)

Immunohistochemistry was performed for DLL4, JAGGED1 and HES1 in TMJ condyles following exposure to saline control and TNF-alpha.

**Supplemental Table 1: PCR Primers**

| <b>Gene</b>       | <b>FWD or REV</b> | <b>Sequence</b>               |
|-------------------|-------------------|-------------------------------|
| <i>Rn Gapdh</i>   | Forward           | CCG CAT CTT CTT GTG CAG TG    |
|                   | Reverse           | GGT AAC CAG GCG TCC GAT AC    |
| <i>Rn Acan</i>    | Forward           | CCA TGT GTG GGT GAC AAG GA    |
|                   | Reverse           | GCT CCA TTT GTG TGG CGA AG    |
| <i>Rn Sox9</i>    | Forward           | TCT ACT CCA CCT TCA CCT ACA T |
|                   | Reverse           | CTG TGT GTA GAC GGG TTG TT    |
| <i>Rn Col2a1</i>  | Forward           | CAT AGG GCC TGT CTG TTT CTT   |
|                   | Reverse           | CCA TTC AGT GCA GAT CCT AGA G |
| <i>Rn Runx2</i>   | Forward           | GGACCGACACAGCCATATAAA         |
|                   | Reverse           | GCCTCATTCCCTAACCTGAAA         |
| <i>Rn Ocn</i>     | Forward           | ATC TAT GGC ACC ACC GTT TAG   |
|                   | Reverse           | CAT ACT TTC GAG GCA GAG AGA G |
| <i>Rn Pparγ</i>   | Forward           | CTG GCC TCC CTG ATG AAT AAA G |
|                   | Reverse           | AGG CTC CAT AAA GTC ACC AAA G |
| <i>Rn Notch1</i>  | Forward           | CTC AAC ACA CTG GGC TCT TT    |
|                   | Reverse           | ATT CTG ACA TGG GTT GGA GAT G |
| <i>Rn Notch2</i>  | Forward           | CTTACAGCTTCCCTCTGTCATC        |
|                   | Reverse           | CTCTGAGCAACCCTAGCTTATC        |
| <i>Rn Notch3</i>  | Forward           | GCAAGCACTCACACACAATAAA        |
|                   | Reverse           | CTCTACTCTCTCTCTCCCTTCTTC      |
| <i>Rn Notch4</i>  | Forward           | GGCAACAAAAGCACGAGGAG          |
|                   | Reverse           | GTGTAGTCCCGTCGTCTGTG          |
| <i>Rn Dll1</i>    | Forward           | CTCTTCTGCAACCAGGGTAAG         |
|                   | Reverse           | CAGGAAGCCCAAGGTCAAATA         |
| <i>Rn Dll3</i>    | Forward           | GTCCCAGGTTCCCACATTCC          |
|                   | Reverse           | CCAGACGATGGCAGAGAAGG          |
| <i>Rn Dll4</i>    | Forward           | GCCTTCCTTCTGCATTGTTTAC        |
|                   | Reverse           | CCTCCTCCTTCTCCTCTTCTT         |
| <i>Rn Jagged1</i> | Forward           | AGAGAGAGAGAGAGAGAGAGAGA       |
|                   | Reverse           | CCAGAGAAGGGCCAAGATAAC         |
| <i>Rn Jagged2</i> | Forward           | ATGCCACACAGACCCTACCA          |
|                   | Reverse           | CAGCCCTCCTGACCCTATCT          |
| <i>Rn Hes1</i>    | Forward           | ATT CTG ACA TGG GTT GGA GAT G |

|                       |         |                               |
|-----------------------|---------|-------------------------------|
|                       | Reverse | CCA GAA TGT CTG CCT TCT CC    |
| <i>Rn Hes3</i>        | Forward | ACAAAGGAAGGTCCACAAGAG         |
|                       | Reverse | AGAGGAGAGAGAGAGAGAGAGA        |
| <i>Rn Hes5</i>        | Forward | GCTCAGTCCCAAGGAGAAA           |
|                       | Reverse | GAGGAGATGCGTCAGGTG            |
| <i>Rn Hes6</i>        | Forward | GGGAGGACACTACAGAAAGAAG        |
|                       | Reverse | CTCATGCTCAGCCTCAAGAT          |
| <i>Rn Hes7</i>        | Forward | GGAGAAAGGAACAGGGAAAGAA        |
|                       | Reverse | GAAAGGACAGGGAACTGGTATC        |
| <i>Rn Hey1</i>        | Forward | GGC TAT GGA CTA TCG GAG TTT G |
|                       | Reverse | TGG GAT GCG TAG TTG TTG AG    |
| <i>Rn Hey2</i>        | Forward | AGATCTCCACAGCAGCAATAAA        |
|                       | Reverse | GTTGCCAAGCTGCCTTAAAC          |
| <i>Hs Notch1intra</i> | Forward | CTCACCTGGTGCAGACCCAG          |
|                       | Reverse | GCACCTGTAGCTGGTGGCTG          |

**Supplemental Table 2: Antibodies used for immunohistochemistry**

| Primary Antibody     | Source                     |
|----------------------|----------------------------|
| Goat anti- Notch 1   | R&D #AF1057 (1:100)        |
| Rabbit anti- Notch 2 | Abcam #ab8926 (1:100)      |
| Rabbit anti-Notch 4  | Homemade #Rb2-2AFR (1:100) |
| Goat anti- DLL4      | R&D #AF1389 (1:100)        |
| Goat anti-Jagged 1   | R&D #AF599 (1:100)         |
| Rabbit anti-Hes 1    | Santa Cruz #H-140 (1:100)  |

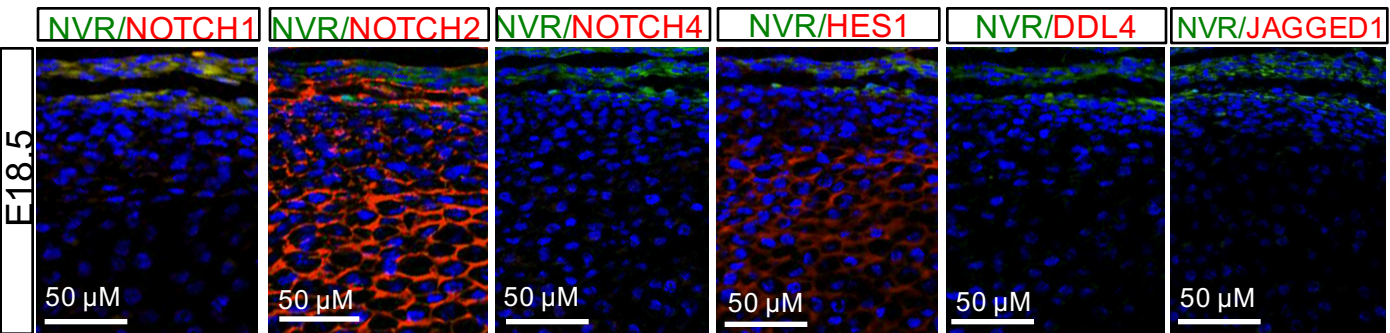

Supplemental Figure 1



a. MW 1 2 3

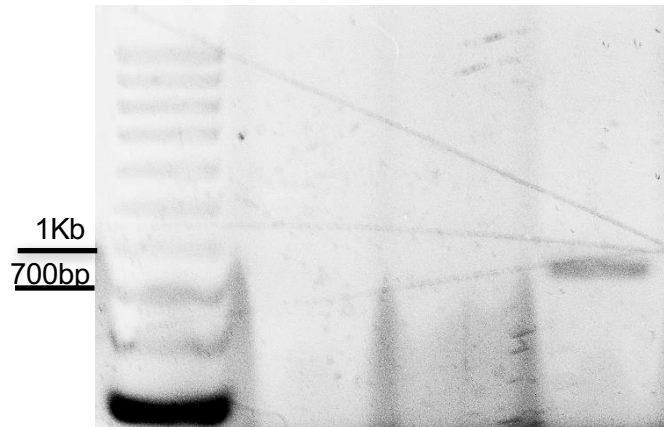

b.

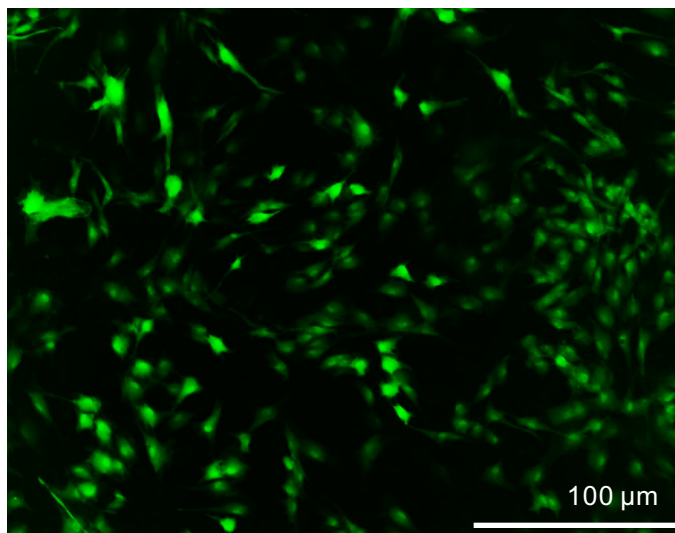

Supplemental Figure 2

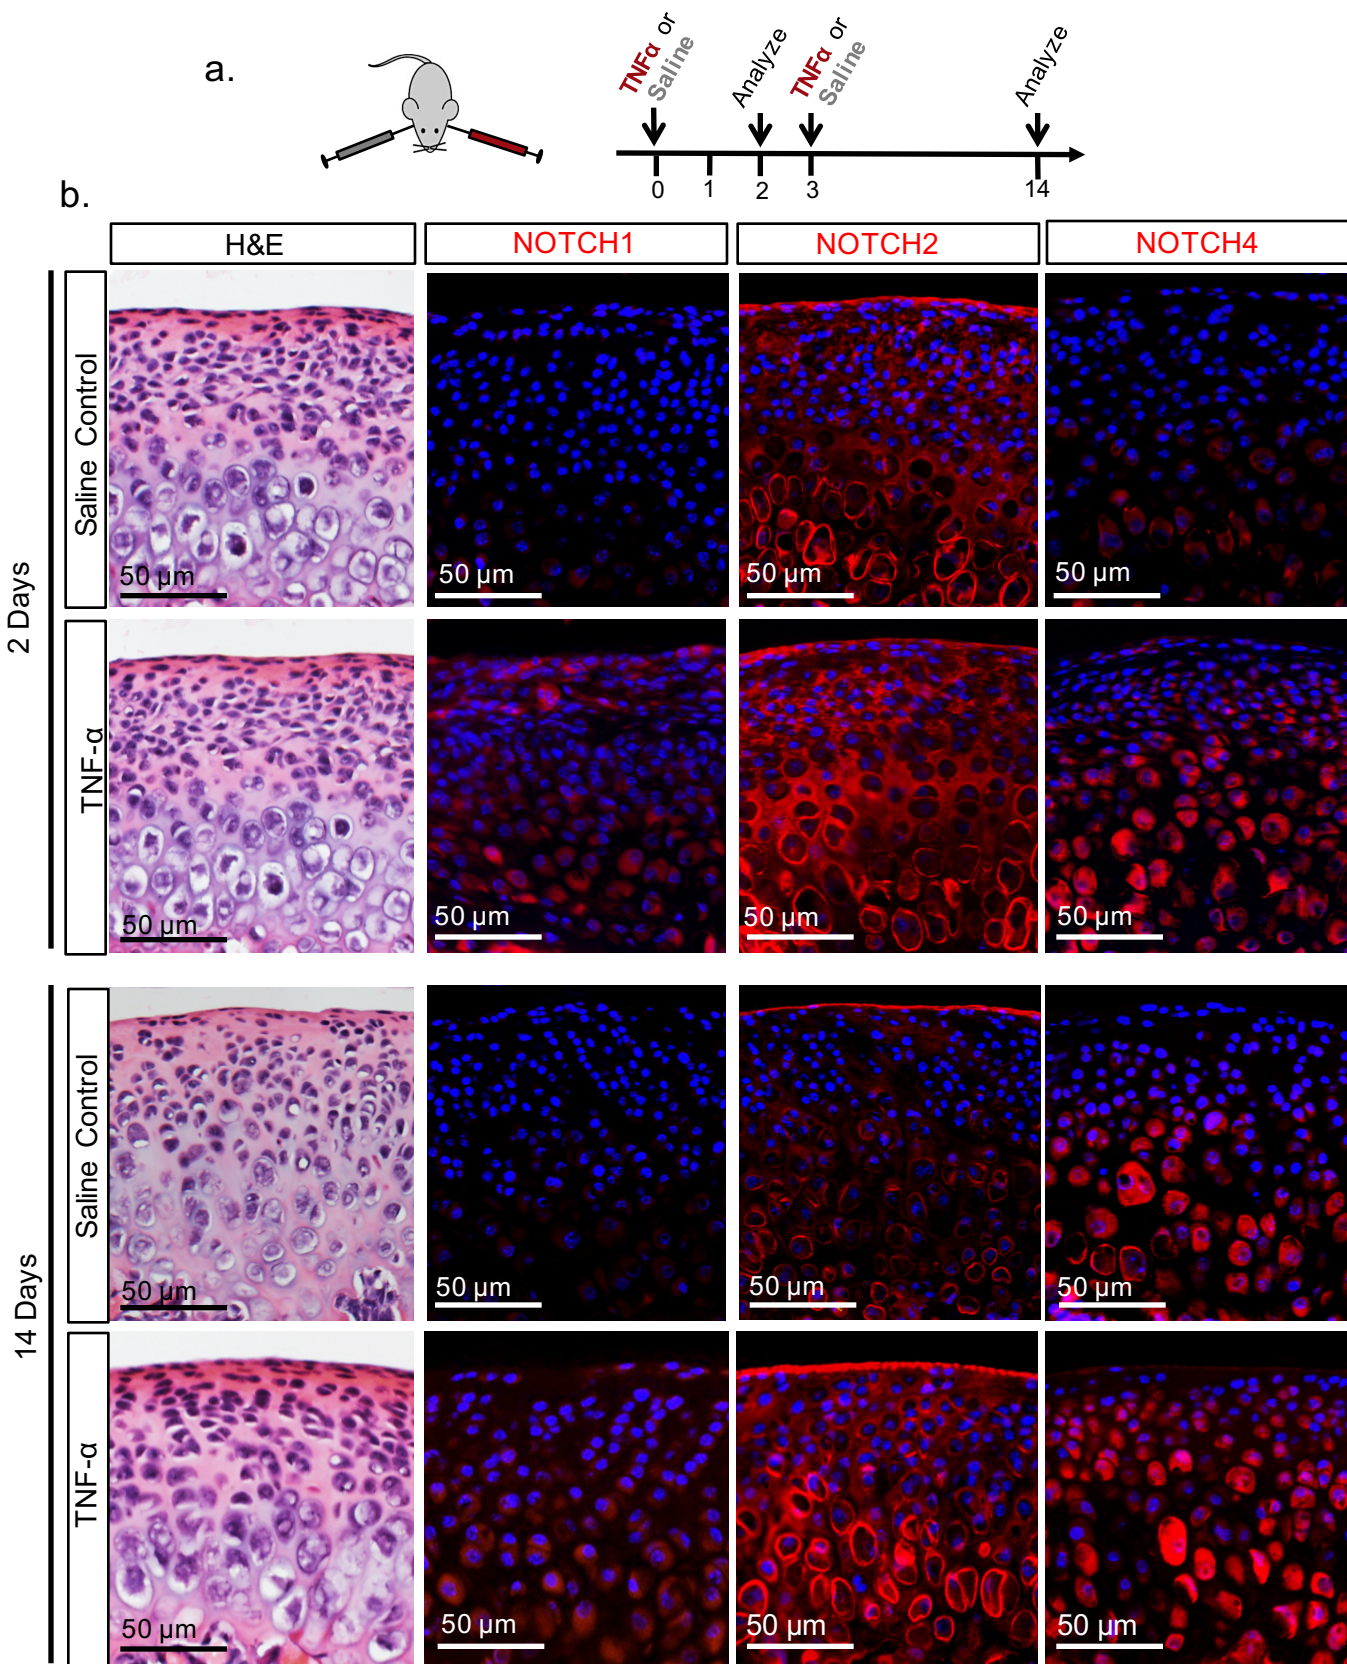

Supplemental Figure 3



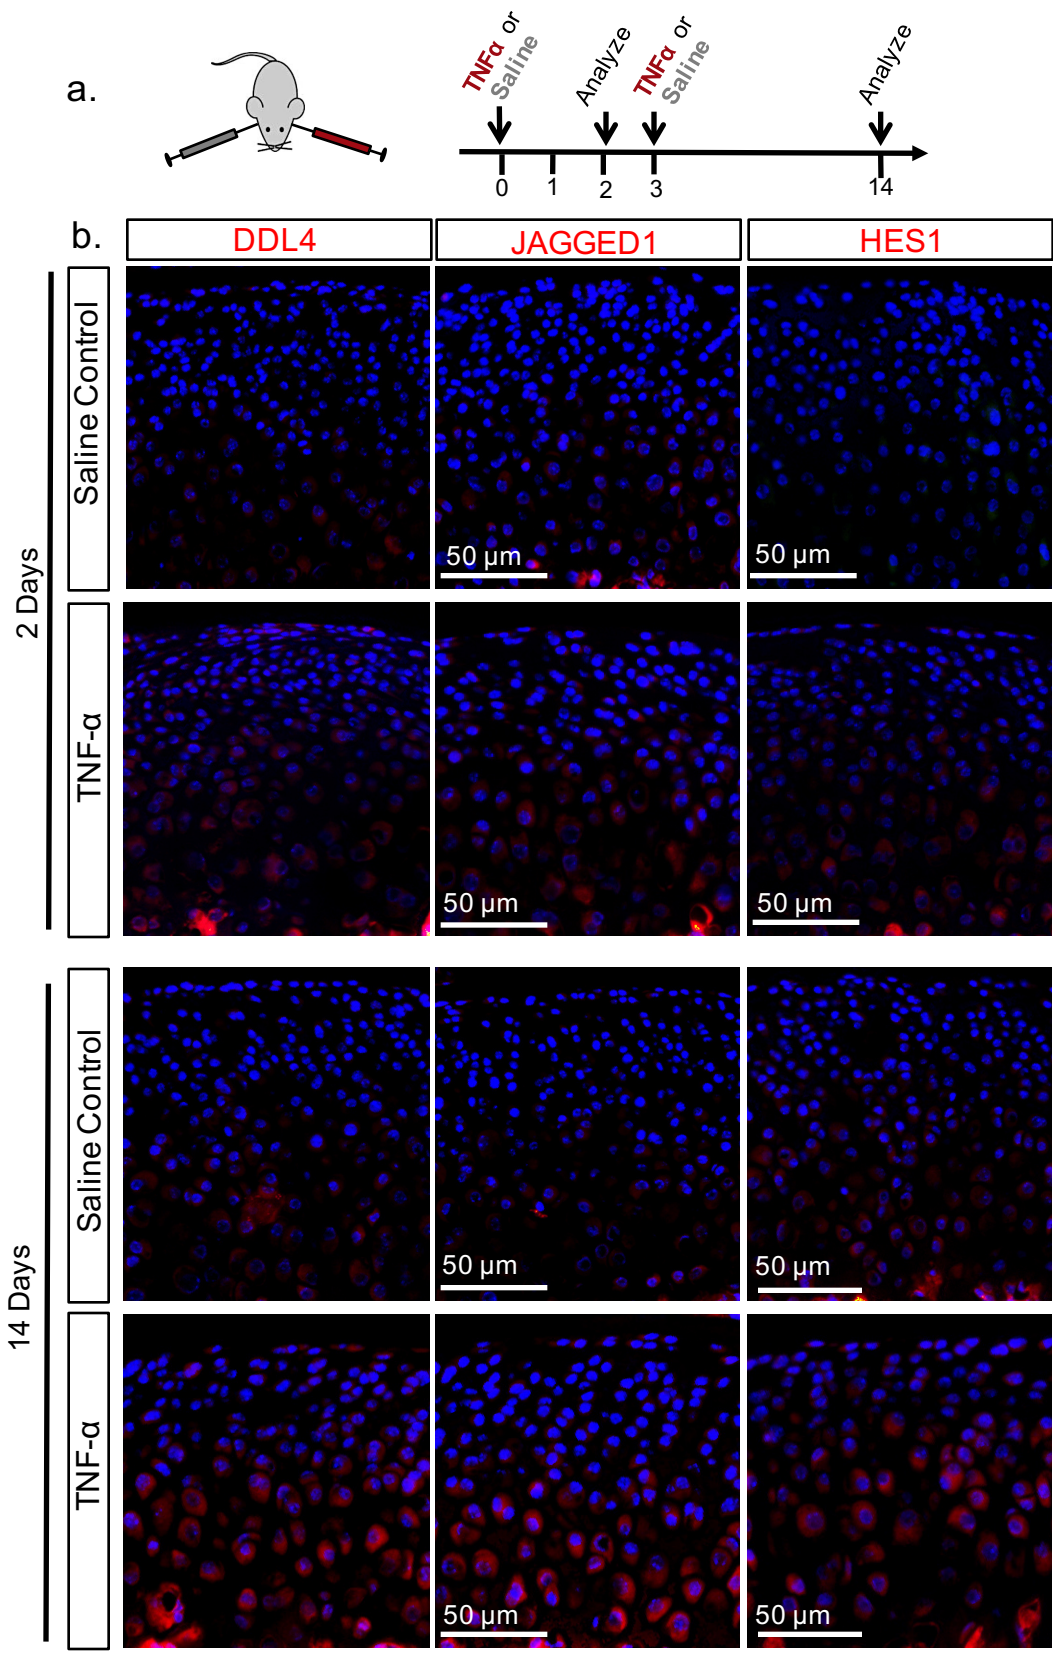

Supplemental Figure 4
